# Supplementary material for: A ratiometric fluorescence method based on silicon nanoparticles/o-phenylenediamine/MnO2 nanosheet systems for vitamin C detection
Source: Royal Society of Chemistry journal article supplement (doi:10.1039/d4nj02245a), 2024-01-01
Supplement: d4nj02245a1.pdf [file d4nj02245a1.pdf]

**A ratiometric fluorescence method based on silicon nanoparticles/o-phenylenediamine/MnO<sub>2</sub> nanosheets system for vitamin C detection**

Congjie Pan <sup>a, b \*</sup>, Meicheng Lu <sup>a</sup>, Longfei Ma <sup>c</sup>, Mingxia Wu <sup>a, \*</sup>

<sup>a</sup> *School of Pharmacy, Henan University of Chinese Medicine, Zhengzhou, 450046, China*

<sup>b</sup> *Henan Engineering Research Center of Modern Chinese Medicine Research, Development and Application, Zhengzhou, 450046, China*

<sup>c</sup> *Henan Police College, Zhengzhou, 450046, China*

\*Corresponding author at: School of Pharmacy, Henan University of Chinese Medicine, Zhengzhou, 450046, China

*E-mail addresses:* pancongjie@hactcm.edu.cn (C.J. Pan); mxwu711@163.com (M.X. Wu).

**Reagents**

(3-aminopropyl) triethoxy silane (APTES), guanine and copper sulfate pentahydrate ( $\text{CuSO}_4 \cdot 5\text{H}_2\text{O}$ ) were purchased from Anhui Zesheng Technology Co., LTD. Hydrogen peroxide ( $\text{H}_2\text{O}_2$ , 30%) was purchased from Yantai Shuangshuang Chemical Co., LTD. Manganese chloride ( $\text{MnCl}_2 \cdot 4\text{H}_2\text{O}$ ) was purchased from Shanghai Haohong Biomedical Technology Co., LTD. Glutathione (GSH) was purchased from Shanghai Maclin Biochemical Technology Co., LTD. Glycine (Gly), alanine (Ala), L-Cysteine (L-Cys), L-glutamic acid (L-Glu), L-histidine (L-His), L-tryptophan (L-Trp), ascorbic acid (VC), glucose, fructose, threonine (Thr), serine (Ser), methionine (Met), lysine (Lys), tyrosine (Tyr), o-phenylenediamine (OPD), dopamine hydrochloride (DA) and tetramethylammonium hydroxide (TMA) were purchased from Aladdin Biochemical Technology Co., LTD. Sodium hydrogen phosphate ( $\text{Na}_2\text{HPO}_4 \cdot 12\text{H}_2\text{O}$ ), sodium dihydrogen phosphate ( $\text{NaH}_2\text{PO}_4 \cdot 2\text{H}_2\text{O}$ ) and ferrous sulfate ( $\text{FeSO}_4$ ) were purchased from Tianjin Fuchen Chemical Reagent Factory. Potassium bromide (KBr) and oxalic acid were purchased from Tianjin Fengchuan Chemical Reagent Technology Co., LTD. Sodium chloride (NaCl), citric acid and urea were purchased from Zhengzhou Paini Chemical Reagent Factory. Zinc sulfate ( $\text{ZnSO}_4$ ) was purchased from Luoyang Haohua Chemical Reagent Co., LTD. Lead nitrate ( $\text{Pb}(\text{NO}_3)_2$ ) and barium chloride ( $\text{BaCl}_2$ ) were purchased from Beijing Red Star Chemical Plant. Silver nitrate ( $\text{AgNO}_3$ ), aluminum nitrate ( $\text{Al}(\text{NO}_3)_3$ ), calcium chloride ( $\text{CaCl}_2$ ) and magnesium nitrate ( $\text{Mg}(\text{NO}_3)_2$ ) were purchased from Tianjin Kemiou Chemical Reagent Co., LTD. Cadmium sulfate ( $\text{CdSO}_4 \cdot 8\text{H}_2\text{O}$ ) was purchased from Tianjin Damao Chemical Reagent Factory. Cobalt sulfate

( $\text{CoSO}_4 \cdot 7\text{H}_2\text{O}$ ) was purchased from Tianjin Kaitong Chemical Reagent Co., LTD. Nickel chloride ( $\text{NiCl}_2 \cdot 6\text{H}_2\text{O}$ ) was purchased from Chengdu Kelon Chemical Reagent Factory. Mercury nitrate ( $\text{Hg}(\text{NO}_3)_2$ ) was purchased from Jiaying Chemical Reagent Co., LTD. Vitamin C tablets, chewable vitamin C tablets and vitamin C injections were purchased from local pharmacies. Ultrapure water was used throughout the experiment.

### **Apparatus**

American FEI Tecnai F20 transmission electron microscopy (TEM) was used to observe the morphology of SiNPs and  $\text{MnO}_2$  nanosheets. Germany Bruker D8 Advance powder X-ray diffractometer (PXRD) was used to determine the crystalline structure of SiNPs. Ultraviolet-2600i ultraviolet-visible (UV-Vis) spectrophotometer was used to investigate the optical properties of SiNPs and the detection mechanism of the method. Both the Shimadzu/Krayos AXIS Ultra DLD photoelectron spectrometer (XPS) in Japan and the Thermo Scientific Nicolet 6700 Fourier Transform Infrared spectrometer (FT-IR) were used to analyze the chemical bond formation of SiNPs. The Edinburgh FLS1000 steady state/transient fluorescence spectrometer was used to analyze the fluorescence lifetime of SiNPs under different conditions. The F-7000 fluorescence spectrometer was used to measure the fluorescence spectra under different experimental conditions. Shanghai TF-FD-1 freeze-drying oven was used for freeze-drying SiNPs solution.

### **Pretreatment and detection of actual samples**

Vitamin C tablets, chewable vitamin C tablets and vitamin C injection were

selected as the actual samples in this experiment. These samples were pretreated as follows: After 20 vitamin C tablets and 10 chewable vitamin C tablets were weighed separately, the two tablets were ground into a powder. 0.01g vitamin C tablet powder was dissolved in 5.0 mL ultra-pure water. 0.04g vitamin C chewable tablet powder was dissolved in 5.0 mL ultra-pure water. After the sample solution was filtered by 0.22  $\mu\text{m}$  filter membrane, the filtrate was diluted with ultra-pure water to a certain volume for use. After vitamin C injection was centrifuged (15000 rpm, 10 min), 10  $\mu\text{L}$  of supernatant was taken into the centrifuge tube, which was diluted to 5 mL with ultra-pure water for subsequent use. A certain volume of sample diluent was added to the SiNPs/OPD/MnO<sub>2</sub> probe solution in place of VC standard solution. The contents of VC in the actual samples were calculated by the FL intensity ratio ( $F_{560}/F_{465}$ ) of the ratiometric fluorescent probe and the fitted working curve.

### Measurement of relative fluorescence QY

Using quinine sulfate (QY: 55%) as a reference, the fluorescence emission spectra of SiNPs and quinine sulfate with different absorbance were measured at the same excitation wavelength. The relative fluorescence QY of SiNPs was calculated by Equation S1. In addition, the absorbance of both was less than 0.10 to ensure the accuracy of the results.

$$\varphi = \varphi_1 \times \frac{A_1}{I_1} \times \frac{I}{A} \times \frac{n^2}{n_1^2} \quad \text{Equation S1}$$

In Equation S1,  $\varphi$  and  $\varphi_1$  were the relative fluorescence QY of SiNPs and quinine sulfate, respectively.  $A$  and  $A_1$  were absorbance of SiNPs and quinine sulfate, respectively.  $I$  and  $I_1$  were the integrated fluorescence emission peak intensities of

SiNPs and quinine sulfate, respectively.  $n$  and  $n_1$  were the solvent refractive indices of SiNPs and quinine sulfate, respectively.

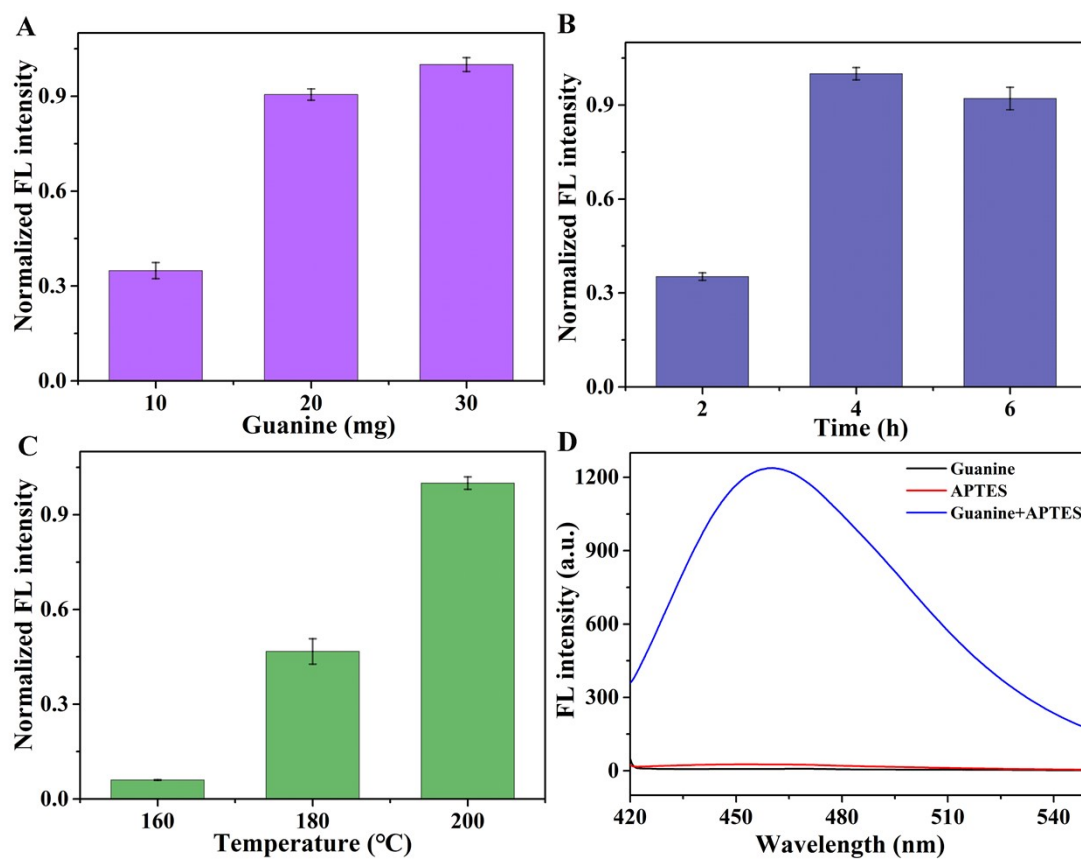

**Fig. S1.** (A) Normalized FL intensity of SiNPs under different dosage of guanine; (B) Normalized FL intensity of SiNPs at different reaction time; (C) Normalized FL intensity of SiNPs at different reaction temperature; (D) Fluorescence emission spectra of APTES, guanine and APTES + guanine after reaction at 200 °C for 4 h. The volume of SiNPs was 50  $\mu$ L. The total volume of solution was 2 mL.

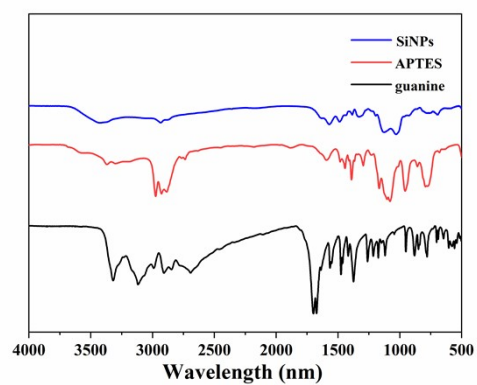

**Fig. S2.** FT-IR spectra of SiNPs, APTES and guanine.

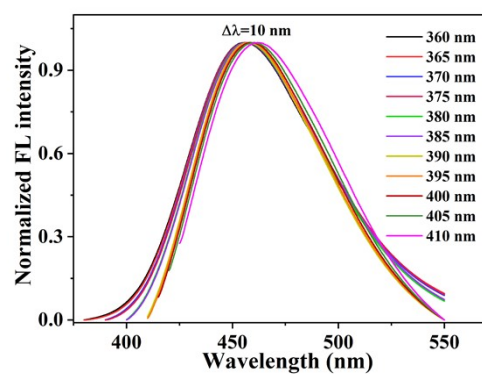

**Fig. S23.** Fluorescence emission spectra of SiNPs at different excitation wavelengths (360~410 nm). The volume of SiNPs was 50  $\mu$ L. The total volume of solution was 2 mL.



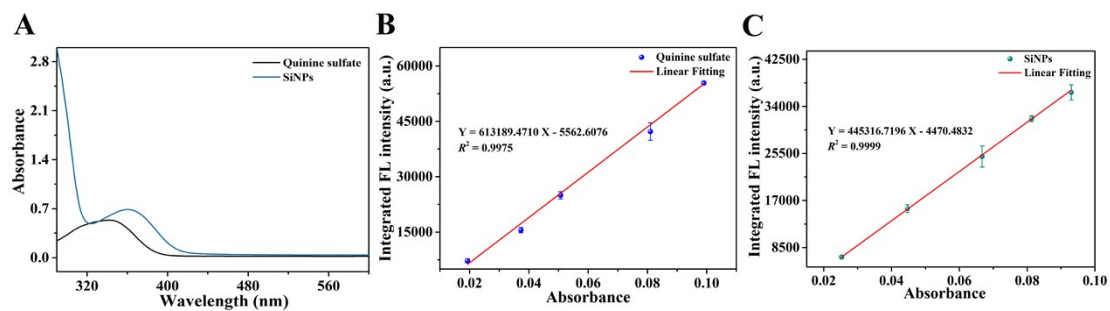

**Fig. S34.** (A) UV-Vis absorption spectra of SiNPs and quinine sulfate; (B) Plots of integrated FL intensity of quinine sulfate as a function of optical absorbance; (C) Plots of integrated FL intensity of SiNPs as a function of optical absorbance. The error bar is the standard deviation of three parallel tests. The volume of SiNPs was 50  $\mu$ L. The total volume of solution was 2 mL.

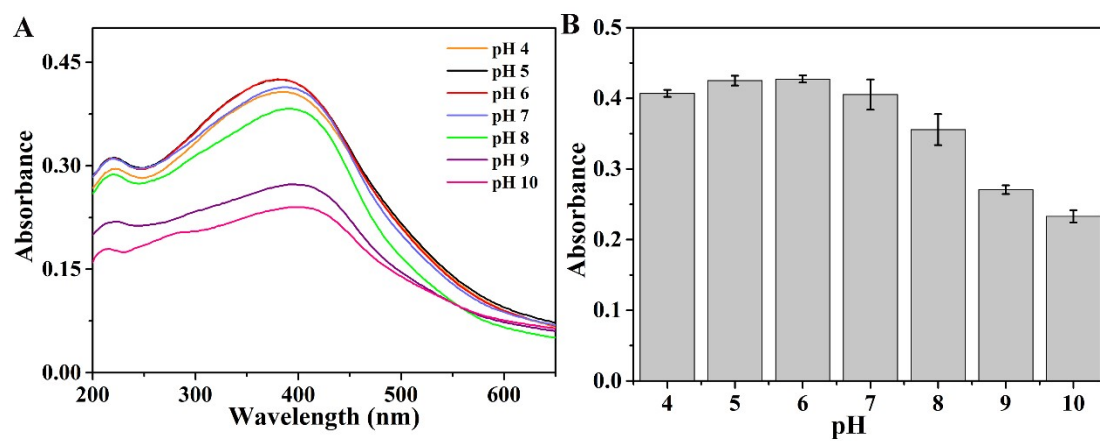

**Fig. S45.** (A) UV-Vis absorption spectra of MnO<sub>2</sub> nanosheets at different pH; (B)

Absorbance of MnO<sub>2</sub> nanosheets at 380 nm at different pH. The volume of MnO<sub>2</sub>

nanosheets was 20  $\mu$ L. The total volume of solution was 2 mL.

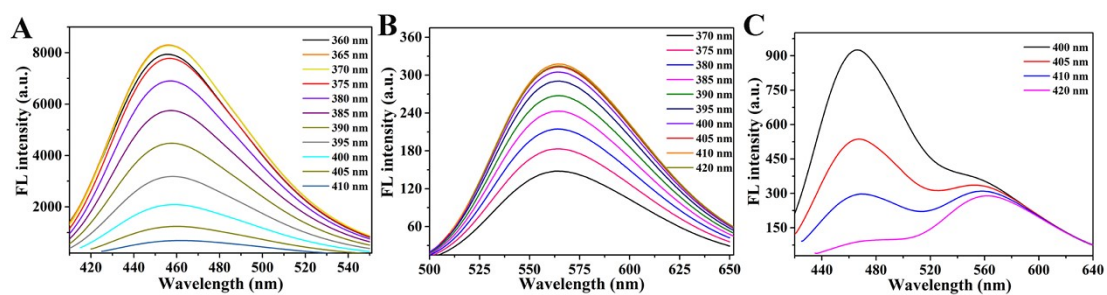

**Fig. S56.** Fluorescence emission spectra of (A) SiNPs, (B) oxOPD and (C) SiNPs/OPD/MnO<sub>2</sub> at different excitation wavelengths. The total volume of SiNPs/OPD/MnO<sub>2</sub> probe solution was 2 mL (The volume of SiNPs was 50  $\mu$ L. The volume of MnO<sub>2</sub> nanosheets was 20  $\mu$ L. The concentration of OPD was 100  $\mu$ M.).

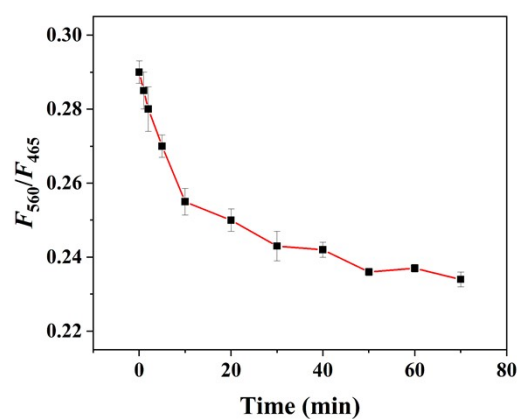

**Fig. S7.** The FL intensity ratio ( $F_{560}/F_{465}$ ) of SiNPs/OPD/MnO<sub>2</sub> probe after incubation with 30  $\mu$ M VC for different time (0-70 min). The total volume of SiNPs/OPD/MnO<sub>2</sub> probe solution was 2 mL (The volume of SiNPs was 50  $\mu$ L. The volume of MnO<sub>2</sub> nanosheets was 20  $\mu$ L. The concentration of OPD was 100  $\mu$ M.).

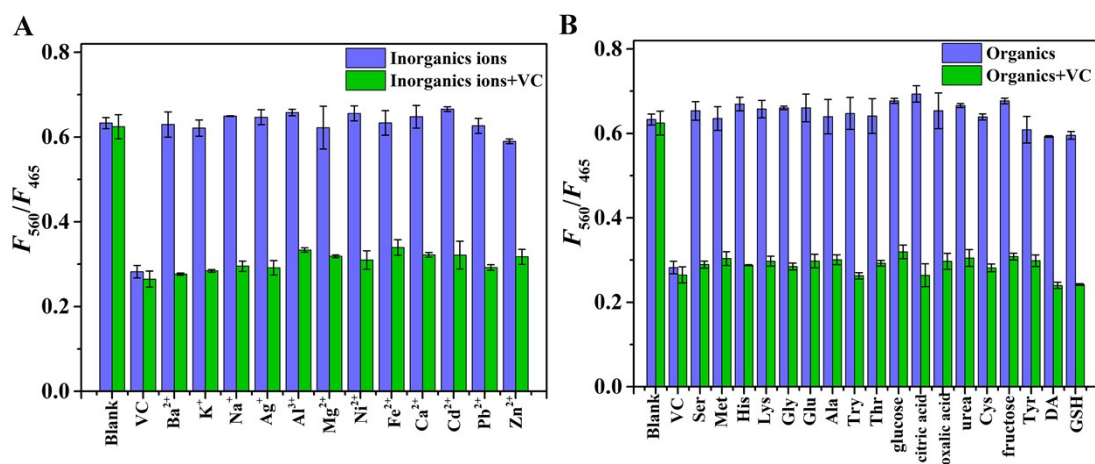

**Fig. S68.** (A) FL intensity ratio ( $F_{560}/F_{465}$ ) of the SiNPs/OPD/MnO<sub>2</sub> probe after addition of inorganic ions (purple bar) and the subsequent addition of 30  $\mu$ M VC (green bar); (B) FL intensity ratio ( $F_{560}/F_{465}$ ) of the SiNPs/OPD/MnO<sub>2</sub> probe after addition of organic substances (purple bar) and the subsequent addition of 30  $\mu$ M VC (green bar). The concentration of K<sup>+</sup>, Na<sup>+</sup>, Cd<sup>2+</sup> and urea was 100  $\mu$ M, respectively. The concentration of Ag<sup>+</sup>, citric acid and cysteine was 50  $\mu$ M, respectively. The concentration of Fe<sup>2+</sup>, glutathione and tyrosine was 10  $\mu$ M, respectively. The dopamine concentration was 5  $\mu$ M. The concentration of other interferences was 200  $\mu$ M. The total volume of SiNPs/OPD/MnO<sub>2</sub> probe solution was 2 mL (The volume of SiNPs was 50  $\mu$ L. The volume of MnO<sub>2</sub> nanosheets was 20  $\mu$ L. The concentration of OPD was 100  $\mu$ M.).

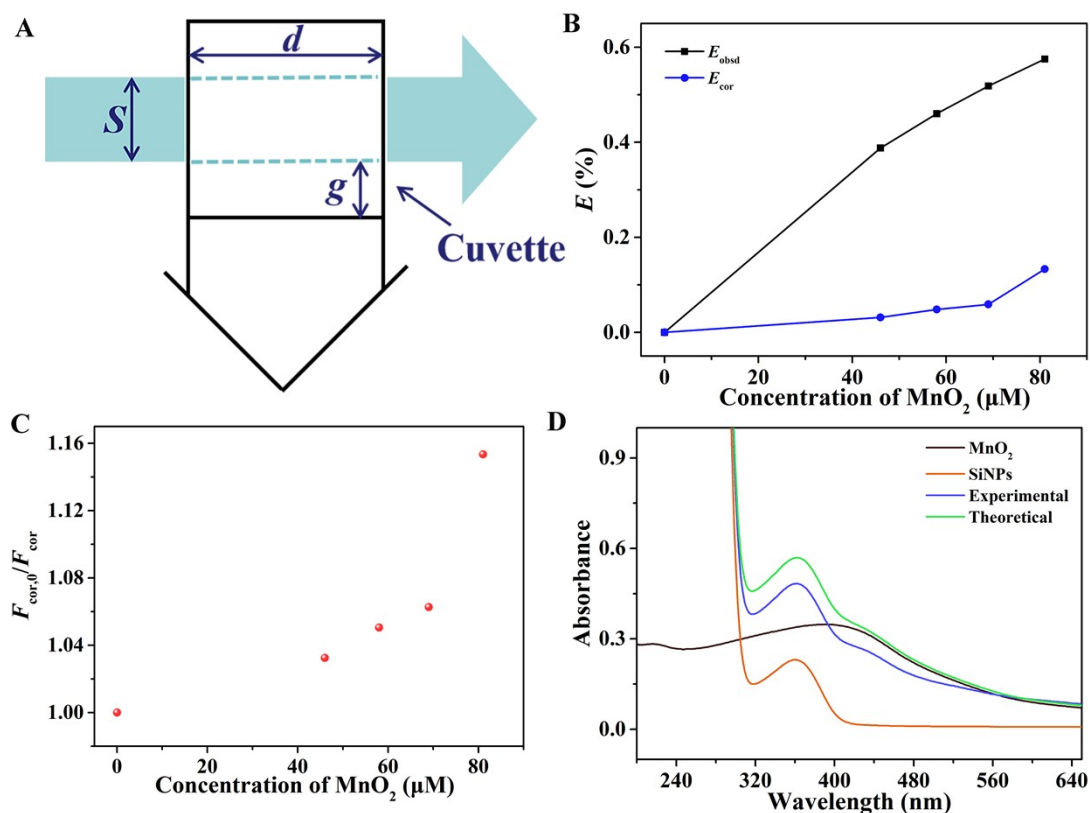

**Fig. S79.** (A) The parameters used in equation (1).  $g$  was the distance between the edge of the excited beam and the edge of the cubed ( $g=0.25$  cm);  $d$  was the width of the cubed ( $d=1.00$  cm);  $s$  was the thickness of the excited beam ( $s=0.50$  cm). (B) Inhibition efficiency of the measured ( $E_{obsd}$ ) and corrected ( $E_{cor}$ ) FL intensity of SiNPs at 465 nm.

(C) Influence of MnO<sub>2</sub> nanosheets concentrations on the corrected FL intensity ratio ( $F_{cor,0}/F_{cor}$ ) of SiNPs. (D) UV-Vis spectra of SiNPs, MnO<sub>2</sub> nanosheets, and the theoretical and experimental UV-Vis spectra of the mixture of SiNPs and MnO<sub>2</sub> nanosheets. The volume of SiNPs was 50 μL. The volume of MnO<sub>2</sub> nanosheets was 20 μL. The total volume of solution was 2 mL.

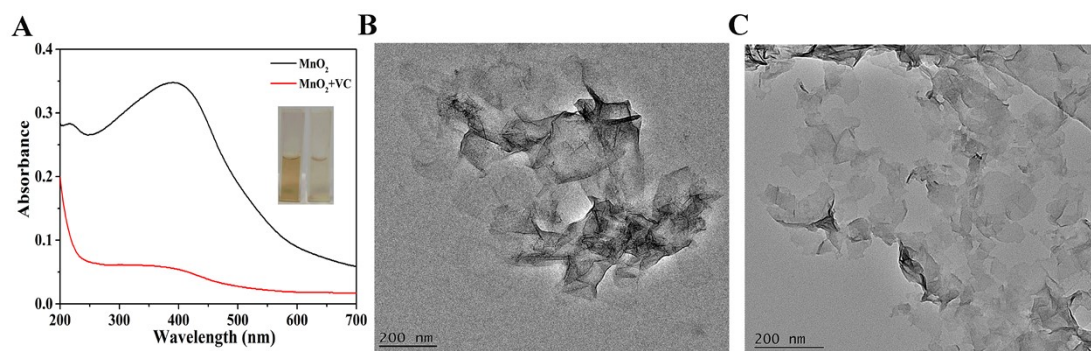

**Fig. S810.** (A) UV-Vis absorption spectra of MnO<sub>2</sub> nanosheets and the mixture of MnO<sub>2</sub> nanosheets and VC (the inset illustration was pictures of MnO<sub>2</sub> nanosheets solution without (left) and with VC (right) in daylight); (B) TEM image of MnO<sub>2</sub> nanosheets; (C) TEM image of the mixture of MnO<sub>2</sub> nanosheets and VC. The volume of MnO<sub>2</sub> nanosheets was 20  $\mu$ L. The total volume of solution was 2 mL.

**Table S1** Parameters for calculation of the fluorescence QY of SiNPs.

|              | Quinine sulfate                   | SiNPs                             |
|--------------|-----------------------------------|-----------------------------------|
| Abs          | 0.019、0.037、0.051、0.081、<br>0.099 | 0.025、0.045、0.067、0.081、<br>0.093 |
| Integrated   | 7215.06、15538.71、                 | 6788.29、15538.71、                 |
| FL intensity | 24973.28、42241.13、55393.46        | 24958.58、31801.53、36535.18        |
| Lope         | 613189.47                         | 445316.72                         |
| QY (%)       | 55.00                             | 39.94                             |



**Table S2** Comparison of ratiometric fluorescence methods for VC detection.

| Material                          | Method       | Linear range         | LOD                | Ref.      |
|-----------------------------------|--------------|----------------------|--------------------|-----------|
| AuNCs-PbS-QDs                     | fluorescence | 3-40 $\mu\text{M}$   | 1.5 $\mu\text{M}$  | 37        |
| molybdenum disulfide quantum dots | fluorescence | 0.5-40 $\mu\text{M}$ | 0.2 $\mu\text{M}$  | 38        |
| RhB@Tb-MOFs                       | fluorescence | 10-100 $\mu\text{M}$ | 2.54 $\mu\text{M}$ | 39        |
| carbon dots/<br>polydopamine      | fluorescence | 0.5-30 $\mu\text{M}$ | 0.28 $\mu\text{M}$ | 40        |
| SiNPs@OPD/MnO <sub>2</sub>        | fluorescence | 0.5~40 $\mu\text{M}$ | 0.42 $\mu\text{M}$ | This work |

**Table S23** Effect of MnO<sub>2</sub> nanosheets and VC on the fluorescence lifetime ( $\tau$ ) of SiNPs.

| Sample                     | $\tau$ (ns) |
|----------------------------|-------------|
| SiNPs                      | 10.01       |
| SiNPs+MnO <sub>2</sub>     | 9.93        |
| SiNPs+MnO <sub>2</sub> +VC | 9.66        |

**Table S34** Parameters for the calculation of IFE proportion.

| MnO <sub>2</sub><br>nanosheets<br>( $\mu$ M) | $A_{\text{ex}}$ <sup>a</sup> | $A_{\text{em}}$ <sup>b</sup> | $CF$ <sup>c</sup> | $F_{\text{obsd}}$ <sup>d</sup> | $F_{\text{cor}}$ <sup>e</sup> | $E_{\text{obsd}}$ <sup>f</sup> | $E_{\text{cor}}$ <sup>g</sup> | $F_{\text{cor},0}/F_{\text{cor}}$ |
|----------------------------------------------|------------------------------|------------------------------|-------------------|--------------------------------|-------------------------------|--------------------------------|-------------------------------|-----------------------------------|
| 0                                            | 0.0510                       | 0.0020                       | 1.06              | 1495.7                         | 1585.3                        | 0.00                           | 0.00                          | 1.00                              |
| 46                                           | 0.2980                       | 0.1713                       | 1.68              | 915.6                          | 1535.3                        | 0.39                           | 0.03                          | 1.03                              |
| 58                                           | 0.3590                       | 0.2130                       | 1.87              | 807.3                          | 1509.0                        | 0.46                           | 0.05                          | 1.05                              |
| 69                                           | 0.4280                       | 0.2440                       | 2.07              | 720.4                          | 1491.8                        | 0.52                           | 0.06                          | 1.06                              |
| 81                                           | 0.4317                       | 0.2793                       | 2.16              | 635.6                          | 1374.3                        | 0.58                           | 0.13                          | 1.15                              |

<sup>a</sup>: The absorbance of SiNPs with MnO<sub>2</sub> nanosheets at excitation wavelength ( $\lambda=405$  nm);

<sup>b</sup>: The absorbance of SiNPs with MnO<sub>2</sub> nanosheets at emission wavelength ( $\lambda=465$  nm);

<sup>c</sup>: The correction factor ( $CF=F_{\text{cor}}/F_{\text{obsd}}$ ) should be less than 3 to ensure the accuracy of the results;

<sup>d</sup>: The measured FL intensity of SiNPs with MnO<sub>2</sub> nanosheets at 465 nm;

<sup>e</sup>: The corrected FL intensity of SiNPs with MnO<sub>2</sub> nanosheets at 465 nm after IFE deduction;

<sup>f</sup>: The experimental value of quenching efficiency was calculated by  $1-F_{\text{obsd}}/F_{\text{obsd},0}$  ( $F_{\text{obsd},0}$  was the measured FL intensity of SiNPs in the absence of MnO<sub>2</sub> nanosheets);

<sup>g</sup>: The corrected value of quenching efficiency was calculated by  $1-F_{\text{cor}}/F_{\text{cor},0}$  ( $F_{\text{cor},0}$  was the corrected FL intensity of SiNPs in the absence of MnO<sub>2</sub> nanosheets).
